# Supplementary material
Source: PubMed Central journal article supplement (PMC4656858)
Supplement: mmc1.pdf [file mmc1.pdf]

## Molecular mechanism of membrane recognition and subsequent insertion of lipidated LC3 protein

Lipi Thukral, Durba Sengupta, Amrita Ramkumar, Divya Murthy, Nikhil Agrawal and Rajesh S. Gokhale

### Supplementary Information

Table S1: Summary of Simulations: We have performed extensive coarse-grain molecular dynamics simulations of LC3-PE to understand the membrane binding and permeation of lipidated protein. Simulation set-up were different with respect to membrane lipids (charged and uncharged) and protein structures (Ala- and Ile-mutant). In addition, two sets of control simulations were performed, namely, non-lipidated and pure bilayer without protein. The details of all the simulations are listed below.

| System                          | LC3    | Membrane lipids               | Water | No. of Simulations | Length of each simulation ( $\mu$ s) |
|---------------------------------|--------|-------------------------------|-------|--------------------|--------------------------------------|
| LC3-PE in zwitterionic membrane | 1      | 1136 POPC                     | 52290 | 15                 | 10                                   |
| LC3-PE in charged membrane      | 1<br>1 | 568 POPC,<br>284 POPE, 284 CL | 57455 | 15                 | 10                                   |
| Ala-mutant-LC3-PE               | 1      | 1136 POPC                     | 52290 | 15                 | 10                                   |
| Ile-mutant-LC3-PE               | 1      | 1136 POPC                     | 52290 | 15                 | 10                                   |
| LC3 (no lipid anchor)           | 1      | 1136                          | 52290 | 5                  | 5                                    |
| POPC                            | -      | 1136                          | 52290 | 5                  | 5                                    |

Table S2: Details of primers for cloning and mutations.

---

|                |                                                |
|----------------|------------------------------------------------|
| L65A,R68A-FWD  | GAGTGAGCTCATCGCGATAATTGCAAGGCGCCTGCAGCTCAATGC  |
| L65A,R68A-REV  | GCATTGAGCTGCAGGCGCCTTGCAATTATCGCGATGAGCTCACTC  |
| R69A-FWD       | GAGTGAGCTCATCGCGATAATTGCAAGGCGCCTTACAGCTCAATGC |
| R69A-REV       | GCATTGAGCTGTAAGCGCGCTGCAATTATCGCGATGAGCTCACTC  |
| R69I-FWD       | GAGTGAGCTCATCGCGATAATTGCAATCCGCTTACAGCTCAATGC  |
| R69I-REV       | GCATTGAGCTGTAAGCGGATTGCAATTATCGCGATGAGCTCACTC  |
| R69E-FWD       | GAGTGAGCTCATCGCGATAATTGCAAGGCGCCTTACAGCTCAATGC |
| R69E-REV       | GCATTGAGCTGTAAGCGCTCTGCAATTATCGCGATGAGCTCACTC  |
| LC3B REV-XhoI  | GGGATCCTTACACTGACAATTCATCCC                    |
| LC3B FWD-BamHI | GCCTCGAGCTATGCCGTCTGGAGAAGACCTTC               |

---

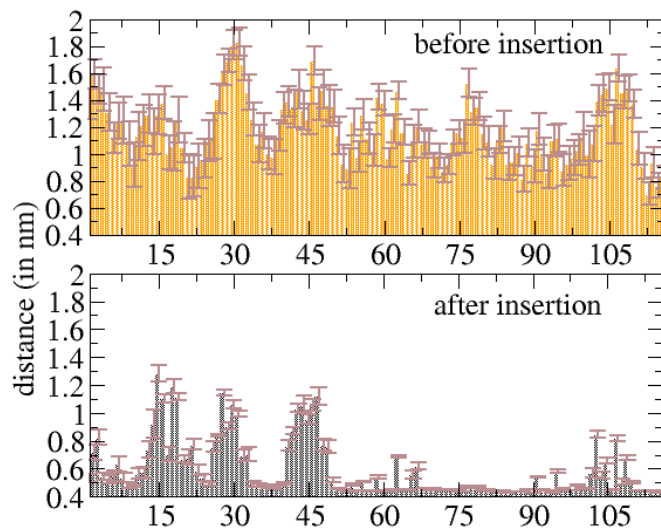

Figure S1: Residue-wise distribution of distance of the protein with the center of mass of the membrane. The trajectories were divided into before- and after insertion segments and is related to Figure 2. Error bars show the standard error calculated from fourteen productive trajectories.

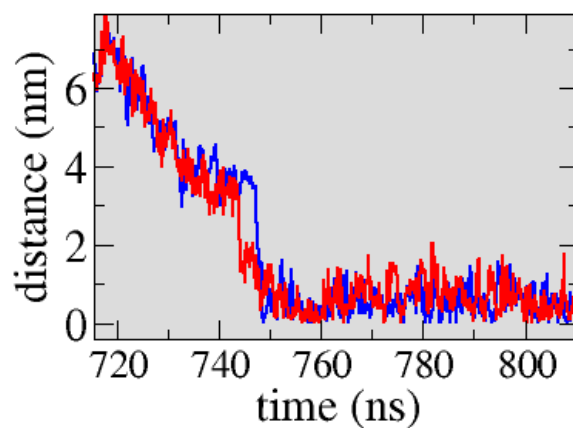

Figure S2: Time evolution of partitioning of individual acyl chain as a function of distance to the center of the membrane. The distance of last atom of each acyl chain was monitored and thus two chains are represented in blue and red, respectively. This is related to molecular mechanism shown in detail in Figure 2.

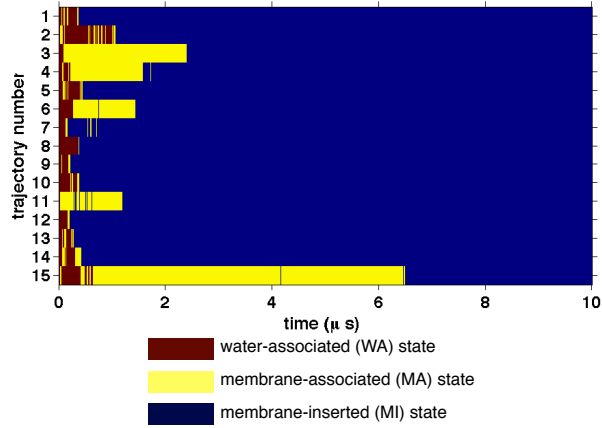

Figure S3: Time evolution of the distance between the PE chain of the LC3 and negatively charged bilayer along the fifteen trajectories. The lipid anchor of protein inserts in all trajectories. The rows represent the existence of the following: (1) Water-associated (maroon), (2) Membrane-associated (yellow), (3) Membrane-inserted (blue).

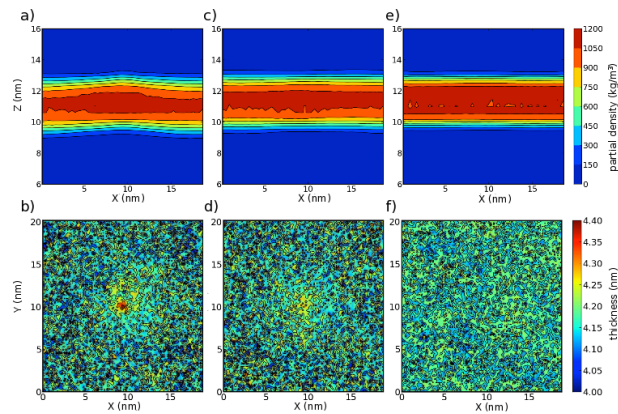

Figure S4: **Membrane Properties.** Upper and lower panel show the partial densities and membrane thickness, respectively, calculated for one of the representative trajectory. **A-B:** the point of insertion of the lipid anchor; **C-D:** 3  $\mu$ s after insertion of the lipid anchor and **E- F:** for a pure bilayer. The partial densities are calculated along the membrane normal and one of the membrane lateral axis and averaging over the other lateral axis. Membrane thickness is calculated as the difference between the position of the headgroup phosphate beads. For further details see Methods section.

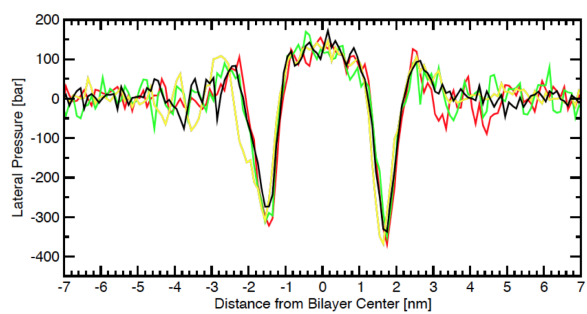

Figure S5: **Lateral Pressure Profile for all fourteen trajectories.** In particular, these profiles were calculated within 1 nm of the protein to assess the local changes.
